# Supplementary material for: Maleic, glycolic and acetoacetic acids-leaching for recovery of valuable metals from spent lithium-ion batteries: leaching parameters, thermodynamics and kinetics
Source: R Soc Open Sci. 2019 Sep 4;6(9):191061. doi: 10.1098/rsos.191061 (PMC6774949; doi:10.1098/rsos.191061)
Supplement: Additional data for the main body of the paper [file rsos191061supp1.docx]

Maleic, glycolic and acetoacetic acids-leaching for recovery of valuable metals from spent LIBs: Leaching parameters, thermodynamics and kinetics

Borui Liu1, Qing Huang1*, Yuefeng Su1*, Liuye Sun1, Tong Wu1,

Guange Wang1, Ryan M. Kelly2 and Feng Wu1

1School of Materials Science and Engineering, Beijing Institute of Technology, Beijing 100081, China.

2Rykell Scientific Editorial, LLC, Los Angeles, CA, USA.

**Keywords:** Spent lithium ion batteries; Metal recovery; Maleic acid; Glycolic acid; Acetoacetic acid

*Author for correspondence (Q. Huang: huangqing3121@sina.com; Y. Su: suyuefeng@bit.edu.cn).

Supplementary materials

Table S1. The element component on the surface of the particles of the active cathodic materials and leaching residue from EDS (weight %)

| Element | Active cathodic material | Leaching residue | | |
| --- | --- | --- | --- | --- |
| Maleic acid | Glycolic acid | Acetoacetic acid |
| Co | 62.63 | 72.20 | 79.10 | 77.45 |
| O | 32.68 | 27.80 | 20.90 | 22.55 |

Table S2. Experimental results of the orthogonal experiment for maleic acid

| No. | Leaching parameter | | | | |  | Leaching efficiency  % | |
| --- | --- | --- | --- | --- | --- | --- | --- | --- |
| Temperature  ℃ | Reaction time  min | Acid concentration  mol L-1 | H2O2 concentration  vol % | Solid/liquid ratio  g L-1 |  | Li | Co |
| 1 | 60 | 30 | 0.5 | 1 | 10 |  | 68.689 | 56.213 |
| 2 | 60 | 40 | 1.5 | 2.5 | 20 |  | 69.624 | 59.686 |
| 3 | 60 | 50 | 2 | 1.5 | 30 |  | 59.682 | 52.417 |
| 4 | 60 | 60 | 1 | 2 | 40 |  | 69.940 | 48.670 |
| 5 | 70 | 30 | 2 | 2 | 20 |  | 64.970 | 60.659 |
| 6 | 70 | 40 | 1 | 1.5 | 10 |  | 80.745 | 73.114 |
| 7 | 70 | 50 | 0.5 | 2.5 | 40 |  | 69.263 | 50.676 |
| 8 | 70 | 60 | 1.5 | 1 | 30 |  | 76.565 | 69.775 |
| 9 | 80 | 30 | 1 | 2.5 | 30 |  | 63.668 | 47.388 |
| 10 | 80 | 40 | 2 | 1 | 40 |  | 63.846 | 59.075 |
| 11 | 80 | 50 | 1.5 | 2 | 10 |  | 75.275 | 68.519 |
| 12 | 80 | 60 | 0.5 | 1.5 | 20 |  | 73.168 | 68.388 |
| 13 | 90 | 30 | 1.5 | 1.5 | 40 |  | 75.797 | 70.790 |
| 14 | 90 | 40 | 0.5 | 2 | 30 |  | 65.940 | 44.670 |
| 15 | 90 | 50 | 1 | 1 | 20 |  | 74.811 | 69.017 |
| 16 | 90 | 60 | 2 | 2.5 | 10 |  | 63.263 | 61.076 |

Table S3. Experimental results of the orthogonal experiment for glycolic acid

| No. | Leaching parameter | | | | |  | Leaching efficiency  % | |
| --- | --- | --- | --- | --- | --- | --- | --- | --- |
| Temperature  ℃ | Reaction time  min | Acid concentration  mol L-1 | H2O2 concentration  vol % | Solid/liquid ratio  g L-1 |  | Li | Co |
| 1 | 60 | 30 | 0.5 | 1 | 10 |  | 75.149 | 63.168 |
| 2 | 60 | 40 | 1.5 | 2.5 | 20 |  | 74.958 | 74.900 |
| 3 | 60 | 50 | 2 | 1.5 | 30 |  | 77.276 | 76.803 |
| 4 | 60 | 60 | 1 | 2 | 40 |  | 84.186 | 83.915 |
| 5 | 70 | 30 | 2 | 2 | 20 |  | 88.285 | 83.075 |
| 6 | 70 | 40 | 1 | 1.5 | 10 |  | 85.643 | 84.916 |
| 7 | 70 | 50 | 0.5 | 2.5 | 40 |  | 74.180 | 70.140 |
| 8 | 70 | 60 | 1.5 | 1 | 30 |  | 81.390 | 77.240 |
| 9 | 80 | 30 | 1 | 2.5 | 30 |  | 79.215 | 79.210 |
| 10 | 80 | 40 | 2 | 1 | 40 |  | 84.935 | 79.531 |
| 11 | 80 | 50 | 1.5 | 2 | 10 |  | 90.016 | 83.100 |
| 12 | 80 | 60 | 0.5 | 1.5 | 20 |  | 74.934 | 66.707 |
| 13 | 90 | 30 | 1.5 | 1.5 | 40 |  | 82.624 | 82.208 |
| 14 | 90 | 40 | 0.5 | 2 | 30 |  | 77.297 | 66.737 |
| 15 | 90 | 50 | 1 | 1 | 20 |  | 81.434 | 77.652 |
| 16 | 90 | 60 | 2 | 2.5 | 10 |  | 87.493 | 87.484 |

Table S4. Experimental results of the orthogonal experiment for acetoacetic acid

| No. | Leaching parameter | | | | |  | Leaching efficiency /% | |
| --- | --- | --- | --- | --- | --- | --- | --- | --- |
| Temperature  ℃ | Reaction time  min | Acid concentration  mol L-1 | H2O2 concentration  vol % | Solid/liquid ratio  g L-1 |  | Li | Co |
| 1 | 60 | 30 | 0.5 | 1 | 10 |  | 71.132 | 64.065 |
| 2 | 60 | 40 | 1.5 | 2.5 | 20 |  | 77.177 | 76.855 |
| 3 | 60 | 50 | 2 | 1.5 | 30 |  | 86.758 | 83.422 |
| 4 | 60 | 60 | 1 | 2 | 40 |  | 65.261 | 55.095 |
| 5 | 70 | 30 | 2 | 2 | 20 |  | 73.613 | 72.052 |
| 6 | 70 | 40 | 1 | 1.5 | 10 |  | 94.194 | 82.455 |
| 7 | 70 | 50 | 0.5 | 2.5 | 40 |  | 60.624 | 59.691 |
| 8 | 70 | 60 | 1.5 | 1 | 30 |  | 77.081 | 74.384 |
| 9 | 80 | 30 | 1 | 2.5 | 30 |  | 51.147 | 41.428 |
| 10 | 80 | 40 | 2 | 1 | 40 |  | 54.747 | 50.709 |
| 11 | 80 | 50 | 1.5 | 2 | 10 |  | 88.254 | 84.788 |
| 12 | 80 | 60 | 0.5 | 1.5 | 20 |  | 75.467 | 72.518 |
| 13 | 90 | 30 | 1.5 | 1.5 | 40 |  | 82.765 | 72.246 |
| 14 | 90 | 40 | 0.5 | 2 | 30 |  | 65.231 | 65.957 |
| 15 | 90 | 50 | 1 | 1 | 20 |  | 56.701 | 43.103 |
| 16 | 90 | 60 | 2 | 2.5 | 10 |  | 86.647 | 83.880 |

Table S5. Analysis results of the orthogonal experiment for the three organic acids

|  | Parameter factor | Temperature | Reaction time | Acid concentration | H2O2 concentration | Solid/liquid ratio |
| --- | --- | --- | --- | --- | --- | --- |
| Maleic acid | | | | | | |
| Li | K1 | 66.984 | 68.281 | 69.265 | 70.978 | 71.993 |
| K2 | 72.886 | 70.039 | 72.291 | 72.348 | 70.643 |
| K3 | 68.989 | 69.758 | 74.315 | 69.031 | 66.464 |
| K4 | 69.953 | 70.734 | 62.940 | 66.455 | 69.712 |
| Extreme deviation | 5.902 | 2.453 | 11.375 | 5.893 | 5.529 |
| Co | K1 | 54.247 | 58.763 | 54.987 | 63.520 | 64.730 |
| K2 | 63.556 | 59.136 | 59.547 | 66.177 | 64.438 |
| K3 | 60.842 | 60.157 | 67.193 | 55.629 | 53.562 |
| K4 | 61.388 | 61.977 | 58.307 | 54.707 | 57.303 |
| Extreme deviation | 9.309 | 3.215 | 12.206 | 11.471 | 11.168 |
| Glycolic acid | | | | | | |
| Li | K1 | 77.89235 | 81.31822 | 75.39016 | 80.72697406 | 84.57506 |
| K2 | 82.37433 | 80.70829 | 82.61938 | 80.11919222 | 79.90301 |
| K3 | 82.2751 | 80.72651 | 82.24711 | 84.94615301 | 78.79461 |
| K4 | 82.21196 | 82.00072 | 84.4971 | 78.96142333 | 81.48107 |
| Extreme deviation | 4.481983 | 1.292434 | 9.106935 | 5.984729681 | 5.78045 |
| Co | K1 | 74.69673 | 76.91524 | 66.6879 | 74.39781676 | 79.667 |
| K2 | 78.84267 | 76.52117 | 81.42349 | 77.65869892 | 75.58349 |
| K3 | 77.13708 | 76.92387 | 79.36218 | 79.20677962 | 74.99761 |
| K4 | 78.52023 | 78.83643 | 81.72314 | 77.9334239 | 78.94861 |
| Extreme deviation | 4.145941 | 2.315257 | 15.03524 | 4.808962855 | 4.669386 |
| Acetoacetic acid | | | | | | |
| Li | K1 | 75.082 | 74.810 | 68.113 | 64.915 | 79.912 |
| K2 | 76.378 | 67.692 | 61.681 | 79.651 | 75.885 |
| K3 | 67.404 | 73.084 | 81.319 | 78.235 | 70.054 |
| K4 | 72.836 | 76.114 | 80.587 | 68.899 | 65.849 |
| Extreme deviation | 8.974 | 8.422 | 19.638 | 14.735 | 14.063 |
| Co | K1 | 69.860 | 62.448 | 65.558 | 58.065 | 78.797 |
| K2 | 72.145 | 68.994 | 55.520 | 77.660 | 66.132 |
| K3 | 62.361 | 67.751 | 77.068 | 69.473 | 66.298 |
| K4 | 66.296 | 71.469 | 72.516 | 65.463 | 59.435 |
| Extreme deviation | 9.785 | 9.022 | 21.548 | 19.595 | 19.362 |

Table S6. Formation energy of the possible leaching products

| Organic acid | Molecular formula of the products | Formation energy / 10-19 J |
| --- | --- | --- |
| Maleic acid | (C4H3O4)2Co * | 2.214 |
| C4H2O4Co ** | 5.239 |
| C4H3O4Li | 11.43 |
| Glycolic acid | (C2H3O3)2Co | 2.067 |
| C2H3O3Li | 12.02 |
| Acetoacetic acid | (C4H5O4)2Co | 45.43 |
| C4H5O4Li | 21.44 |

* the maleic acid-leaching product **(a)** in Fig 7

** the maleic acid-leaching product **(b)** in Fig 7

Table S7. The equilibrium constants and Gibbs free energy of the acid-leaching reactions

| Maleic acid | |  | Glycolic acid | |  | Acetoacetic acid | |
| --- | --- | --- | --- | --- | --- | --- | --- |
| K | ΔG / kJ mol-1 |  | K | ΔG / kJ mol-1 |  | K | ΔG / kJ mol-1 |
| 1.4510-3 | 18.65 |  | 5.1910-6 | 34.72 |  | 5.7210-5 | 27.87 |

Table S8. The fitting parameters of the surface chemical reaction model for the acid-leaching process by the three organic acids

| Acid-leaching of Li | | | | | | | | |
| --- | --- | --- | --- | --- | --- | --- | --- | --- |
| Temperature  / ºC | Maleic acid | |  | Glycolic acid | |  | Acetoacetic acid | |
| k / min-1 | R2 |  | k / min-1 | R2 |  | k / min-1 | R2 |
| 50 | 0.00200 | 0.993 |  | 0.00198 | 0.994 |  | 0.00208 | 0.996 |
| 60 | 0.00299 | 0.997 |  | 0.00308 | 0.994 |  | 0.00299 | 0.992 |
| 70 | 0.00429 | 0.993 |  | 0.00460 | 0.992 |  | 0.00450 | 0.997 |
| 80 | 0.00602 | 0.998 |  | 0.00639 | 0.997 |  | 0.00638 | 0.998 |
| 90 | 0.00797 | 0.992 |  | 0.00905 | 0.995 |  | 0.00855 | 0.996 |
| Acid-leaching of Co | | | | | | | | |
| Temperature  / ºC | Maleic acid | |  | Glycolic acid | |  | Acetoacetic acid | |
| k / min-1 | R2 |  | k / min-1 | R2 |  | k / min-1 | R2 |
| 50 | 0.00210 | 0.993 |  | 0.00199 | 0.992 |  | 0.00208 | 0.993 |
| 60 | 0.00300 | 0.995 |  | 0.00303 | 0.998 |  | 0.00319 | 0.993 |
| 70 | 0.00430 | 0.991 |  | 0.00450 | 0.995 |  | 0.00460 | 0.996 |
| 80 | 0.00598 | 0.997 |  | 0.00621 | 0.995 |  | 0.00663 | 0.994 |
| 90 | 0.00781 | 0.994 |  | 0.00906 | 0.996 |  | 0.00876 | 0.998 |

Table S9. The fitting parameters of the liquid film diffusion model for the acid-leaching process by the three organic acids

| Acid-leaching of Li | | | | | | | | |
| --- | --- | --- | --- | --- | --- | --- | --- | --- |
| Temperature  ºC | Maleic acid | |  | Glycolic acid | |  | Acetoacetic acid | |
| k / min-1 | R2 |  | k / min-1 | R2 |  | k / min-1 | R2 |
| 50 | 0.00462 | 0.988 |  | 0.00303 | 0.989 |  | 0.00245 | 0.986 |
| 60 | 0.00593 | 0.987 |  | 0.00374 | 0.980 |  | 0.00268 | 0.982 |
| 70 | 0.00664 | 0.985 |  | 0.00500 | 0.978 |  | 0.00346 | 0.978 |
| 80 | 0.00577 | 0.984 |  | 0.00588 | 0.966 |  | 0.00389 | 0.962 |
| 90 | 0.00467 | 0.982 |  | 0.00639 | 0.936 |  | 0.00422 | 0.939 |
| Acid-leaching of Co | | | | | | | | |
| Temperature  / ºC | Maleic acid | |  | Glycolic acid | |  | Acetoacetic acid | |
| k / min-1 | R2 |  | k / min-1 | R2 |  | k / min-1 | R2 |
| 50 | 0.00514 | 0.987 |  | 0.00350 | 0.988 |  | 0.00261 | 0.990 |
| 60 | 0.00614 | 0.986 |  | 0.00444 | 0.976 |  | 0.00316 | 0.989 |
| 70 | 0.00700 | 0.984 |  | 0.00591 | 0.982 |  | 0.00386 | 0.986 |
| 80 | 0.00670 | 0.986 |  | 0.00708 | 0.967 |  | 0.00407 | 0.972 |
| 90 | 0.00545 | 0.983 |  | 0.00801 | 0.951 |  | 0.00463 | 0.968 |

Table S10. The fitting parameters of the ash or product layer diffusion model for the acid-leaching process by the three organic acids

| Acid-leaching of Li | | | | | | | | |
| --- | --- | --- | --- | --- | --- | --- | --- | --- |
| Temperature  / ºC | Maleic acid | |  | Glycolic acid | |  | Acetoacetic acid | |
| k / min-1 | R2 |  | k / min-1 | R2 |  | k / min-1 | R2 |
| 50 | 0.00018 | 0.986 |  | 0.00241 | 0.988 |  | 0.00292 | 0.990 |
| 60 | 0.00043 | 0.986 |  | 0.00423 | 0.987 |  | 0.00441 | 0.988 |
| 70 | 0.00102 | 0.983 |  | 0.00656 | 0.987 |  | 0.00669 | 0.985 |
| 80 | 0.00259 | 0.976 |  | 0.00932 | 0.982 |  | 0.00928 | 0.985 |
| 90 | 0.00531 | 0.962 |  | 0.01305 | 0.979 |  | 0.01184 | 0.982 |
| Acid-leaching of Co | | | | | | | | |
| Temperature  / ºC | Maleic acid | |  | Glycolic acid | |  | Acetoacetic acid | |
| k / min-1 | R2 |  | k / min-1 | R2 |  | k / min-1 | R2 |
| 50 | 0.00015 | 0.988 |  | 0.00213 | 0.990 |  | 0.00284 | 0.989 |
| 60 | 0.00040 | 0.987 |  | 0.00379 | 0.988 |  | 0.00465 | 0.990 |
| 70 | 0.00094 | 0.987 |  | 0.00599 | 0.983 |  | 0.00681 | 0.988 |
| 80 | 0.00220 | 0.979 |  | 0.00867 | 0.983 |  | 0.00962 | 0.986 |
| 90 | 0.00454 | 0.963 |  | 0.01302 | 0.978 |  | 0.01225 | 0.983 |





Fig S1. TG-DSC curves of the spent cathodic material after reaction with the NaOH solution


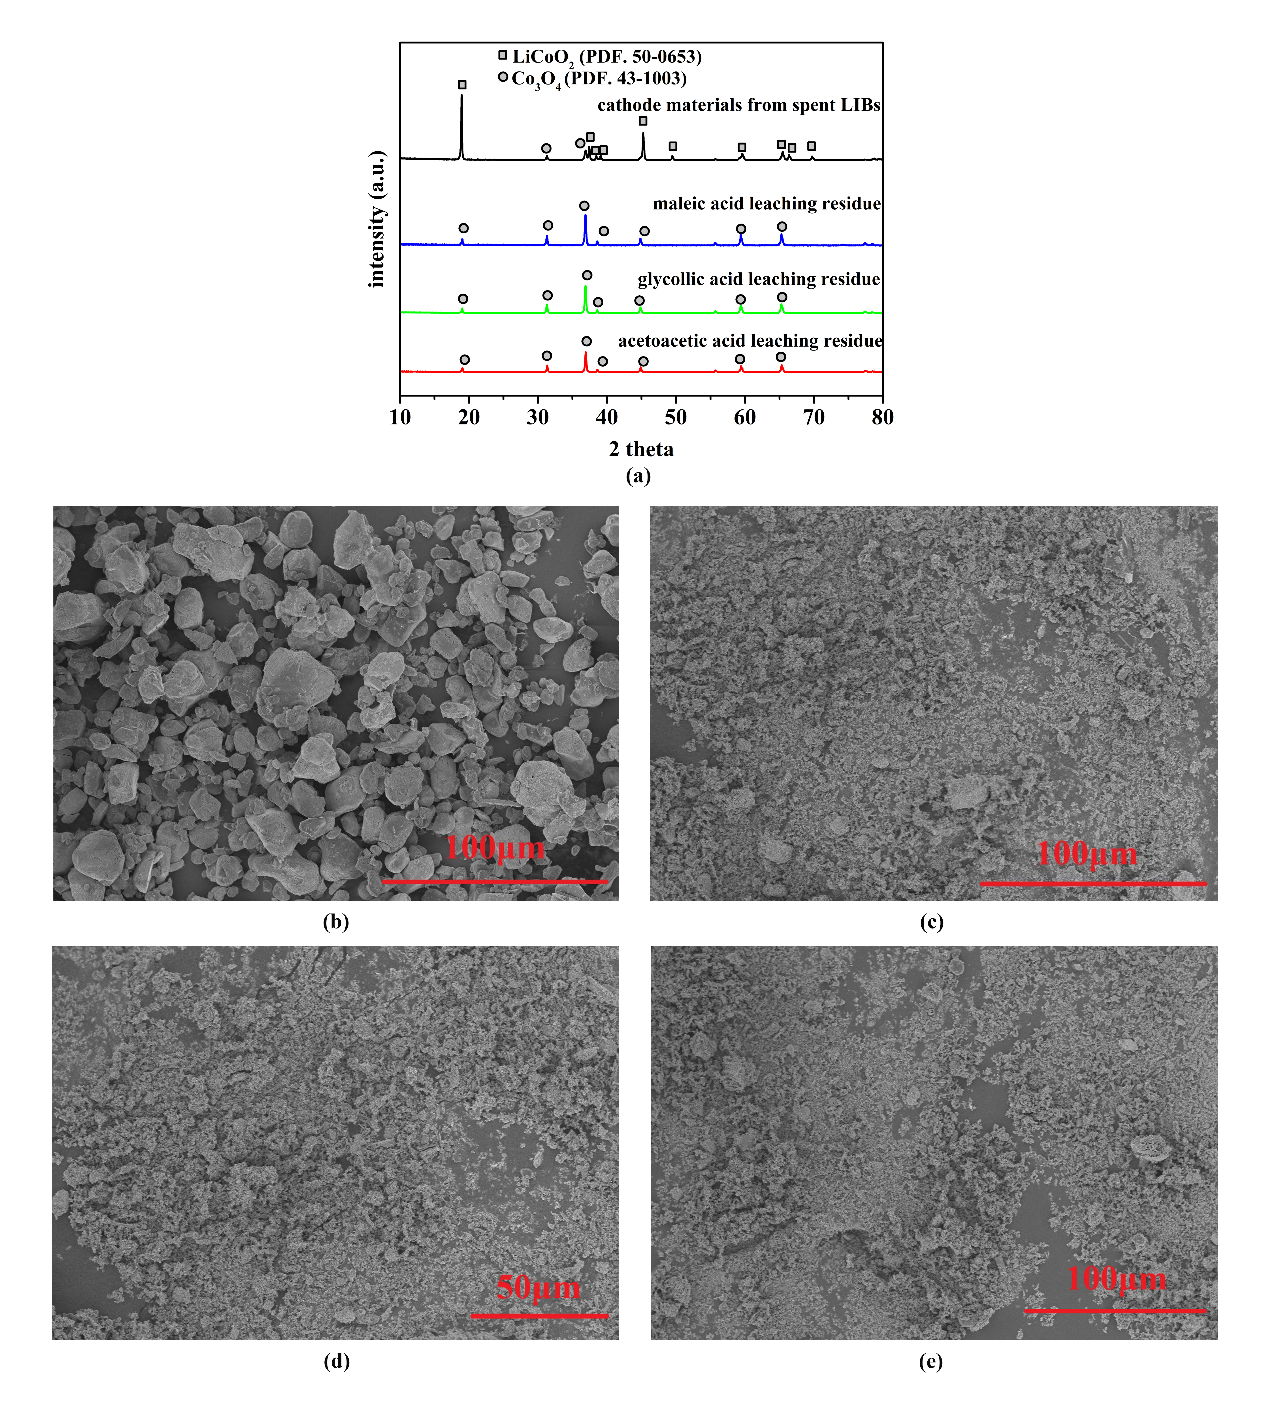


Fig S2. XRD patterns of the active cathodic material before leaching and the leaching residue **(a)**; SEM images of the active cathodic material **(b)** and the leaching residue from maleic acid **(c)**, glycolic acid **(d)** and acetoacetic acid **(e)**


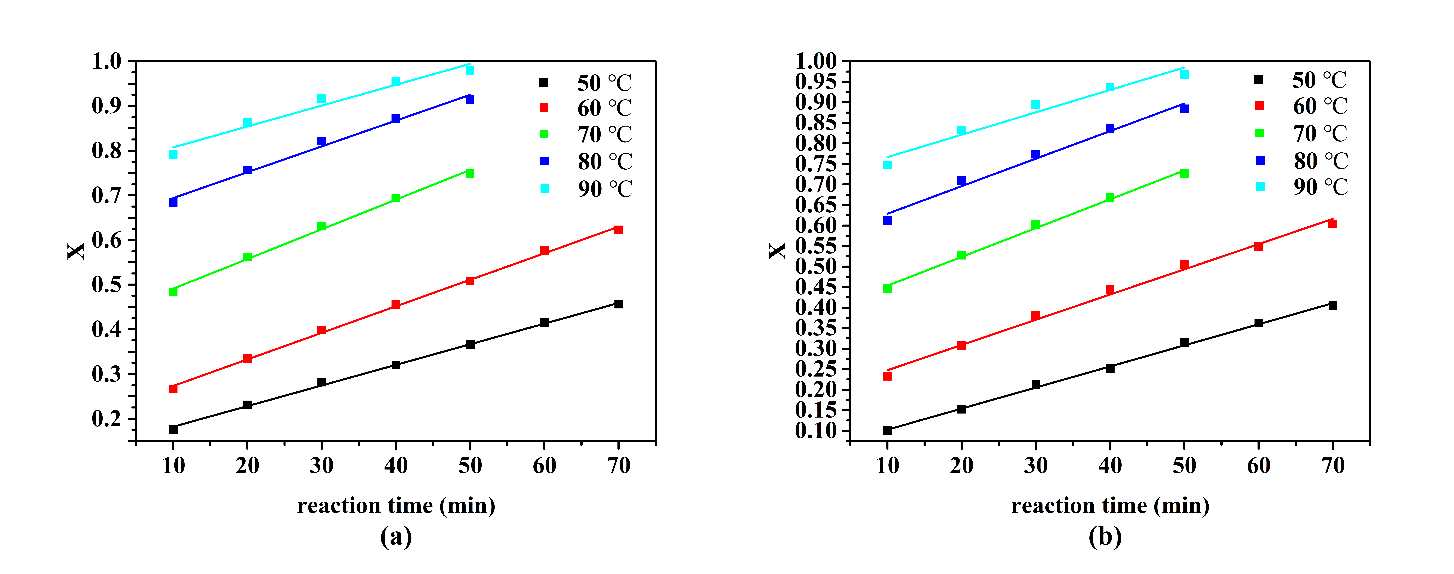


Fig S3. Kinetics study of Li **(a)** and Co **(c)** in maleic acid-leaching process (liquid film diffusion model)


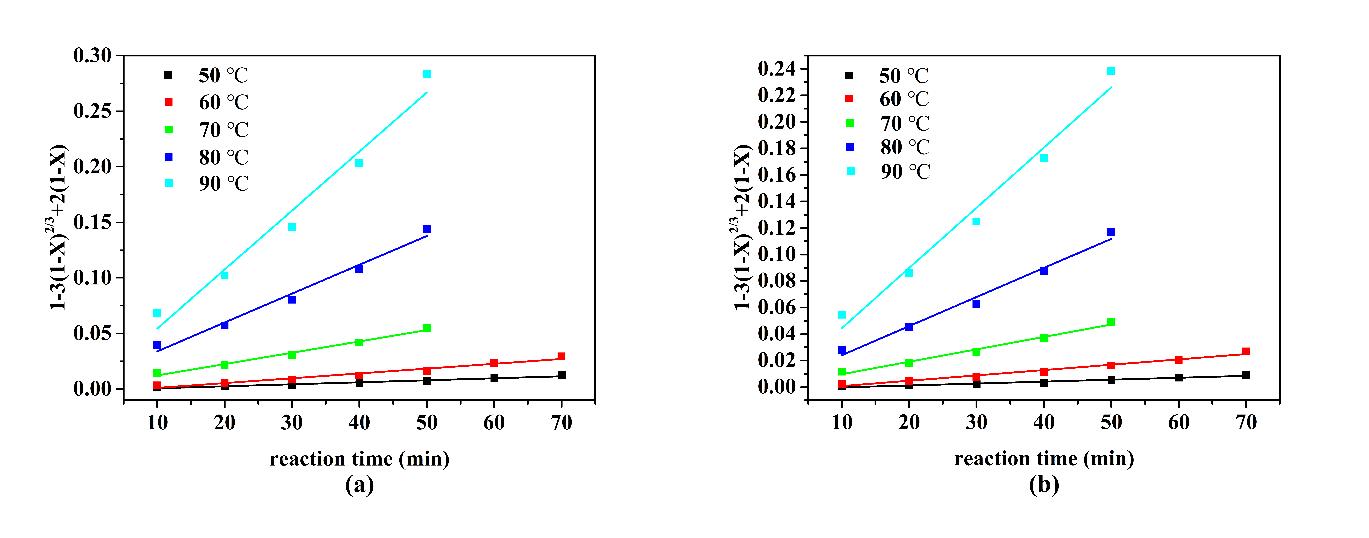


Fig S4. Kinetics study of Li **(a)** and Co **(c)** in maleic acid-leaching process (ash or product layer diffusion model)


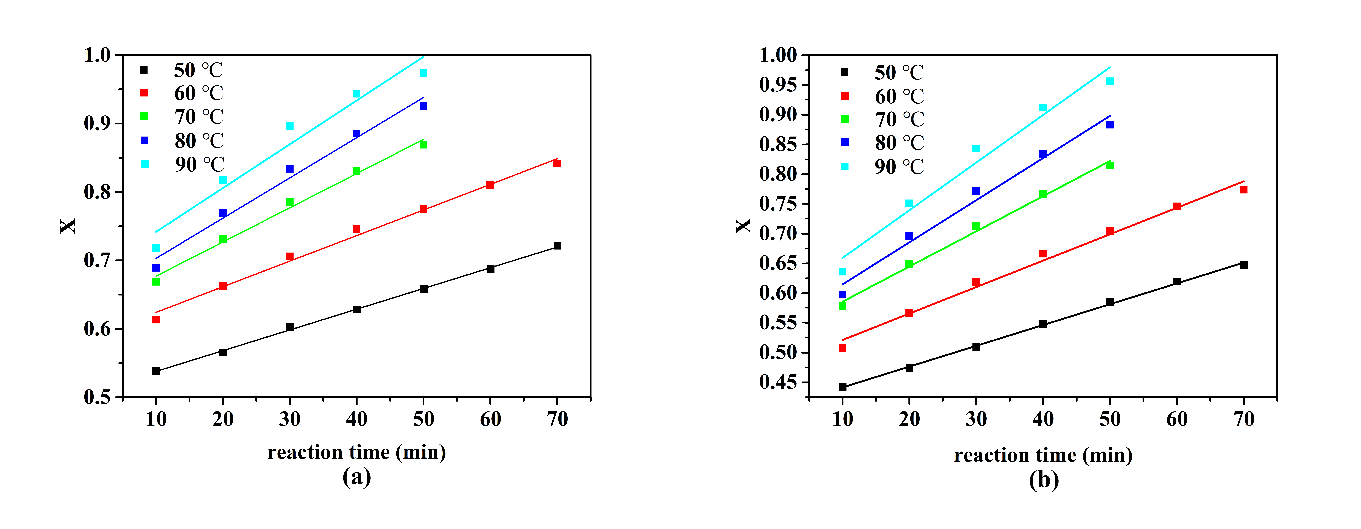


Fig S5. Kinetics study of Li **(a)** and Co **(c)** in glycolic acid-leaching process (liquid film diffusion model)


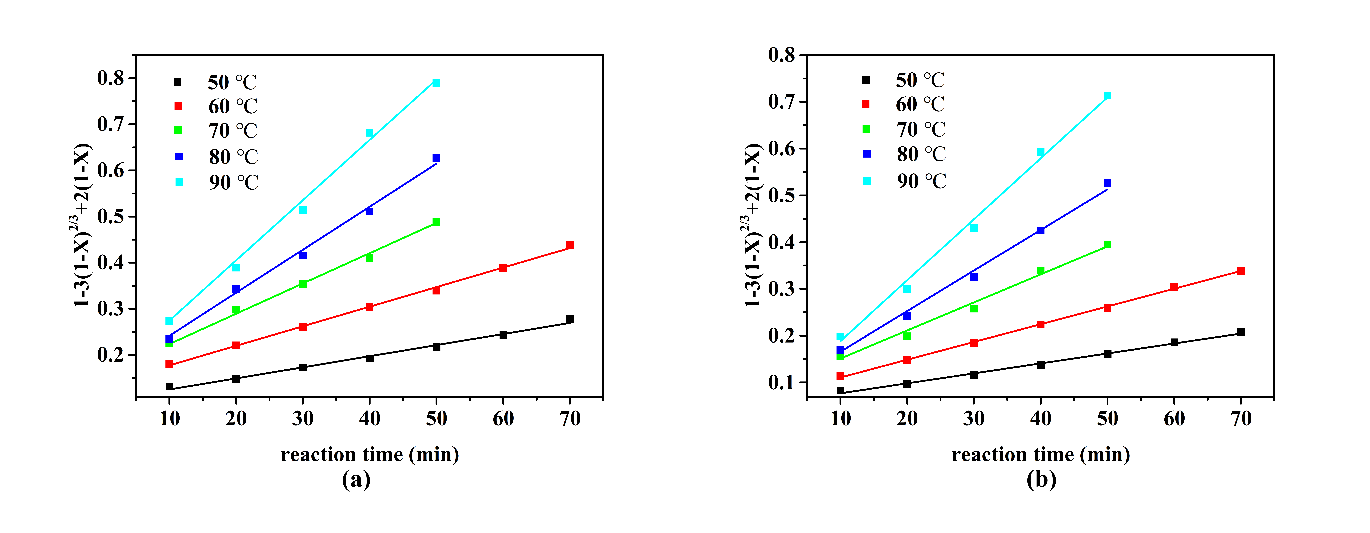


Fig S6. Kinetics study of Li **(a)** and Co **(c)** in glycolic acid-leaching process (ash or product layer diffusion model)


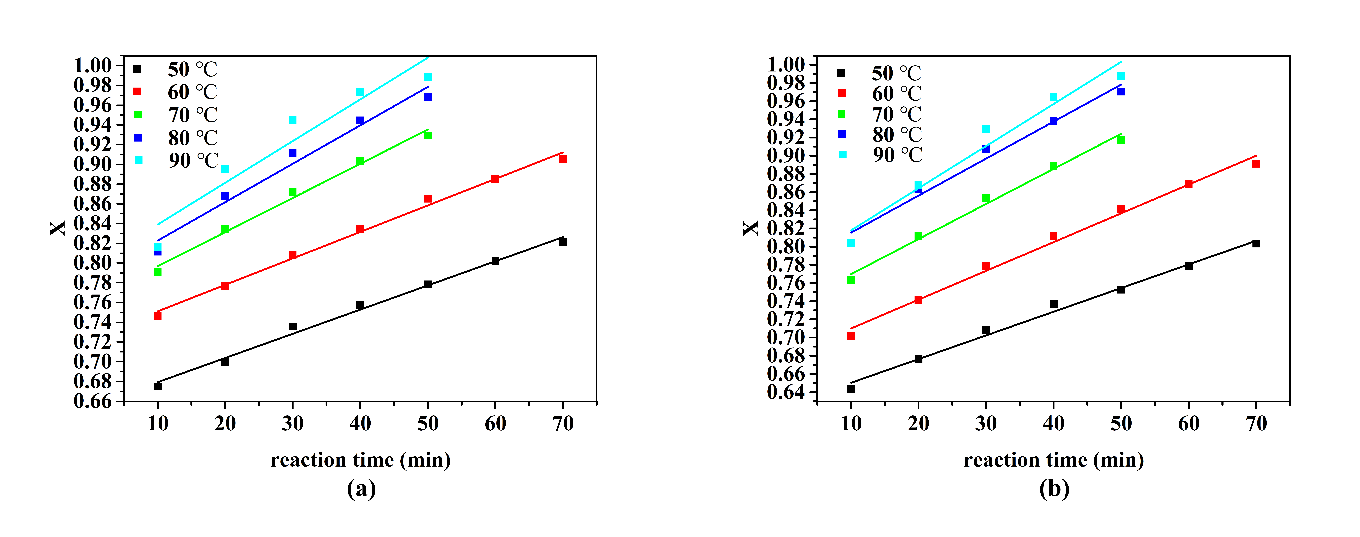


Fig S7. Kinetics study of Li **(a)** and Co **(c)** in acetoacetic acid-leaching process (liquid film diffusion model)


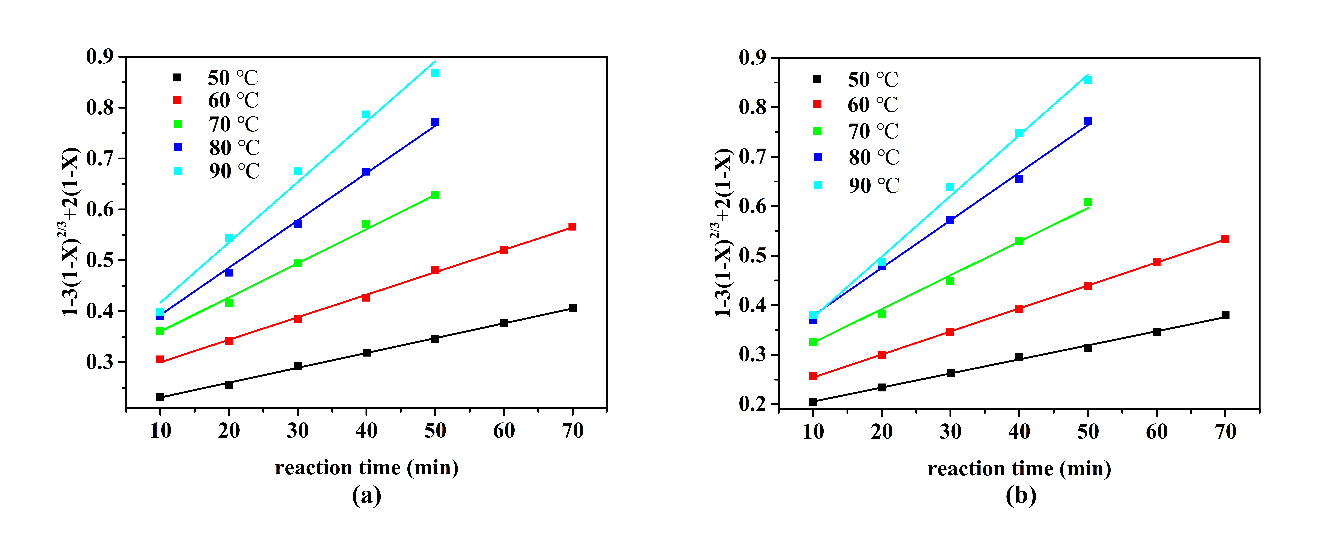


Fig S8. Kinetics study of Li **(a)** and Co **(c)** in acetoacetic acid-leaching process (ash or product diffusion model)
